# Supplementary material
Source: Springer Nature journal article supplement (https://www.springermedizin.de/resource/supplementary/12889_2012_4848_MOESM1_ESM.pdf/9493956)
Supplement: MOESM1 [file 9493956]

# **Supplemental material: A commentary on studies presenting projections of the future prevalence of dementia**

## **Literature search strategy and selection criteria**

The aim of the literature review was to identify articles published in peer-reviewed journals presenting projections concerning the world as a whole or for individual continents. Relevant articles were identified from PubMed using the search '(alzheimer\* or dementia) and (projection or forecast)'. Including only articles published in the last 10-years, written in English, and using adult humans aged 45+ resulted in 281 articles. Screening the title and abstract of these articles seventeen were selected for further inspection. Of these, two were excluded because they were either review articles or editorials, and a further two because they were not relevant (i.e. did not present projections). A further 8 were initially excluded as the projections concerned individual countries rather than continents. Of the remaining five studies, three presented projections for the entire world (1–3); four Europe (2–5); and two North America (2,3). For two studies estimates for certain regions could be combined to provide estimates for Latin America and the Caribbean, as well as Asia, Africa and Oceania (2,3).

Since the studies concerning North America included only the US and Canada in their estimates, we also included three projections concerning the US alone (6–8). This was because, by this definition, 90% of the North American population lives in the US.

## **Results**

Details of these studies are given in Table 1 and the number of cases of dementia or AD projected in Figure 1. Of the studies three extrapolated prevalence estimates to existing population and projections (1,2,4) and five employed cell based macro

simulations based on discrete time multi-state models for the incidence of dementia or Alzheimer's disease (3,5–8). Two of the cell-based macro simulations additionally incorporated disease progression into the multi-state models (3,7).

Irrespective of method or region, the projected number of cases of dementia was predicted to rise considerably during the first half of this century. Due to the larger expected gains in life expectancy for developing countries, steeper increases in the estimated number of cases of dementia in the regions consisting of Latin America and the Caribbean, and Africa, Asia and Oceania compared to Europe and North America (2,3). For example, Ferri et al. (2) estimated that between 2000 and 2040 there would be a 229% increase in cases in Europe but a 534% increase in Latin America and the Caribbean. Moreover, the same study estimated that 59% of all cases of dementia would occur in Asia by 2050, compared to 48% in 2006.

## References

1. Wimo A, Winblad B, Aguero-Torres H, von Strauss E. The magnitude of dementia occurrence in the world. *Alzheimer disease and associated disorders*. 2003 Jan;17(2):63–7.
2. Ferri CP, Prince M, Brayne C, Brodaty H, Fratiglioni L, Ganguli M, et al. Global prevalence of dementia: a Delphi consensus study. *Lancet*. 2005 Dec 17;366(9503):2112–7.
3. Brookmeyer R, Johnson E, Ziegler-Graham K, Arrighi HM. Forecasting the global burden of Alzheimer's disease. *Alzheimer's & dementia : the journal of the Alzheimer's Association*. 2007 Jul;3(3):186–91.
4. Wancata J, Musalek M, Alexandrowicz R, Krautgartner M. Number of dementia sufferers in Europe between the years 2000 and 2050. *European psychiatry : the journal of the Association of European Psychiatrists*. 2003 Oct;18(6):306–13.
5. Mura T, Dartigues J-F, Berr C. How many dementia cases in France and Europe? Alternative projections and scenarios 2010-2050. *European journal of*

neurology : the official journal of the European Federation of Neurological Societies. 2010 Feb;17(2):252–9.

6. Brookmeyer R, Gray S, Kawas C. Projections of Alzheimer’s disease in the United States and the public health impact of delaying disease onset. *American journal of public health*. 1998 Sep;88(9):1337–42.
7. Sloane PD, Zimmerman S, Suchindran C, Reed P, Wang L, Boustani M, et al. The public health impact of Alzheimer’s disease, 2000-2050: potential implication of treatment advances. *Annual review of public health*. 2002 Jan;23:213–31.
8. Hebert LE, Scherr PA, Bienias JL, Bennett DA, Evans DA. Alzheimer disease in the US population: prevalence estimates using the 2000 census. *Archives of neurology*. 2003 Aug;60(8):1119–22.

**Table 1. Details of studies identified in the literature search**

| First author | Year | Condition           | Population | Method                                                              | Period    | Projection                             | Prevalence/Incidence Input                                                                                                               | Mortality adjustment                                      | Progression                                                            |
|--------------|------|---------------------|------------|---------------------------------------------------------------------|-----------|----------------------------------------|------------------------------------------------------------------------------------------------------------------------------------------|-----------------------------------------------------------|------------------------------------------------------------------------|
| Brookmeyer   | 1998 | Alzheimer's Disease | US         | Macro simulation based on discrete time incidence model             | 1997>2047 | US census bureau population projection | Incidence: Pooled estimates across 4 US studies, modelled as exponential function (Bachman 1993; Herbert 1995; Kokmen 1988; Shock, 1984) | RR = 1.44 (Evans, 1991)                                   | na                                                                     |
| Sloane       | 2002 | Alzheimer's Disease | US         | Macro simulation based on discrete time incidence-progression model | 2000>2050 | US census bureau population projection | Prevalence: US General Accounting Office AD estimates, modelled as exponential function and calibrated to match GAO estimates            | Assumed 10% higher for mild and 20% higher for mod/severe | Average 4yr progression (Doody 2001), assume yearly probability is .28 |
| Wimo         | 2003 | Dementia            | World      | Extraplotion of prevalence estimates                                | 1950>2050 | UN population projection               | Prevalence: meta-analysis estimates (Fratiglioni & Rocca, 2001)                                                                          | na                                                        | na                                                                     |
| Hebert       | 2003 | Alzheimer's Disease | US         | Macro simulation based on discrete time incidence model             | 2000>2050 | US census bureau population projection | Incidence: estimates from a Chicago based poputlation study (Evans 2003)                                                                 | RR = 1.44 (Evans, 1991)                                   | na                                                                     |

|            |      |                                     |                                                                                                          |                                                                                        |           |                                       |                                                                                                                                                                                        |                                                                                                                              |                                                                                           |
|------------|------|-------------------------------------|----------------------------------------------------------------------------------------------------------|----------------------------------------------------------------------------------------|-----------|---------------------------------------|----------------------------------------------------------------------------------------------------------------------------------------------------------------------------------------|------------------------------------------------------------------------------------------------------------------------------|-------------------------------------------------------------------------------------------|
| Wancata    | 2003 | Dementia;<br>Alzheimer's<br>Disease | Europe                                                                                                   | Extraplotion<br>of prevalence<br>estimates                                             | 2000>2051 | UN<br>population<br>projection        | Prevalence: Pooled<br>estimates across<br>meta-analyses (Dem:<br>Jorm 1987, Hofman<br>1991, Lobo 2000,<br>Ritchie & Kildea<br>1995; AD: Rocca<br>1991, My & Kellar<br>2000, Lobo 2000) | na                                                                                                                           | na                                                                                        |
| Ferri      | 2005 | Dementia                            | World;<br>Europe;<br>North<br>America;<br>Latin<br>America &<br>Carribbean;<br>Asia, Africa<br>& Oceania | Extraplotion<br>of prevalence<br>estimates                                             | 2001>2040 | UN<br>population<br>projection        | Prevalence: Delphi<br>consensus estimates                                                                                                                                              | RR = 2.38 up to age<br>89; RR = 1.8<br>women age 90+;<br>RR = 1.6 males age<br>90+ (EURODEM<br>study: Jagger et al.<br>2000) | na                                                                                        |
| Brookmeyer | 2007 | Alzheimer's<br>Disease              | World;<br>Europe;<br>North<br>America;<br>Latin<br>America &<br>Carribbean;<br>Asia, Africa<br>& Oceania | Macro<br>simulation<br>based on<br>discrete time<br>incidence-<br>progression<br>model | 2006>2050 | UN<br>population<br>projection        | Incidence: Estimates<br>from meta-analysis<br>(update Jorm &<br>Jolley 1998)                                                                                                           | Excess mortality<br>risk 11% (calibrated<br>against<br>Brookmeyer, 2002)                                                     | Average 6-year<br>progression<br>(Neumann, 2001),<br>assume yearly<br>probability of .167 |
| Mura       | 2010 | Dementia                            | Europe                                                                                                   | Macro<br>simulation<br>based on<br>discrete time<br>incidence<br>model                 | 2010>2050 | Eurostat<br>population<br>projections | Incidence: Estimates<br>from meta-analysis<br>(Frataglioni 2000,<br>EURODEM review)                                                                                                    | Excess risk reduces<br>with age: RR (65-<br>74y) = 3.75; RR (75-<br>84y) = 2.59; RR (85-<br>y+) = 1.59 (Ostbye<br>1999)      | na                                                                                        |
